# Supplementary material for: A facile co-crystallization approach to fabricate two-component carbon dot composites showing time-dependent evolutive room temperature phosphorescence colors
Source: Royal Society of Chemistry journal article supplement (doi:10.1039/d1na00362c), 2021-01-01
Supplement: d1na00362c1.pdf [file d1na00362c1.pdf]

## **A Facile Co-crystallization Approach to Fabricate Two-component Carbon Dots Composites Showing Time-Dependent Evolutive Room Temperature Phosphorescence Colors**

Jian Qu<sup>a</sup>, Xin Zhang<sup>a,b,\*</sup>, Shuyan Zhang<sup>c</sup>, Zhongjie Wang<sup>a</sup>, Yejian Yu<sup>a</sup>, Huajun Ding<sup>a</sup>, Zhiyuan Tang<sup>a</sup>, Xiangjun Heng<sup>a</sup>, Ruiqi Wang<sup>c</sup>, Su Jing<sup>c,\*</sup>

<sup>a</sup> School of Materials Science and Engineering, Yancheng Institute of Technology, Yancheng 224051, PR China, E-mail: xinzhang@ycit.edu.cn;

<sup>b</sup> School of Chemistry and Chemical Engineering, Southeast University, Nanjing, 211189, China, E-mail: xinzhang@ycit.edu.cn;

<sup>c</sup> School of Chemistry and Molecular Engineering, Nanjing Tech University, Nanjing 211816, P.R. China. E-mail: sjing@njtech.edu.cn;

\* Corresponding author

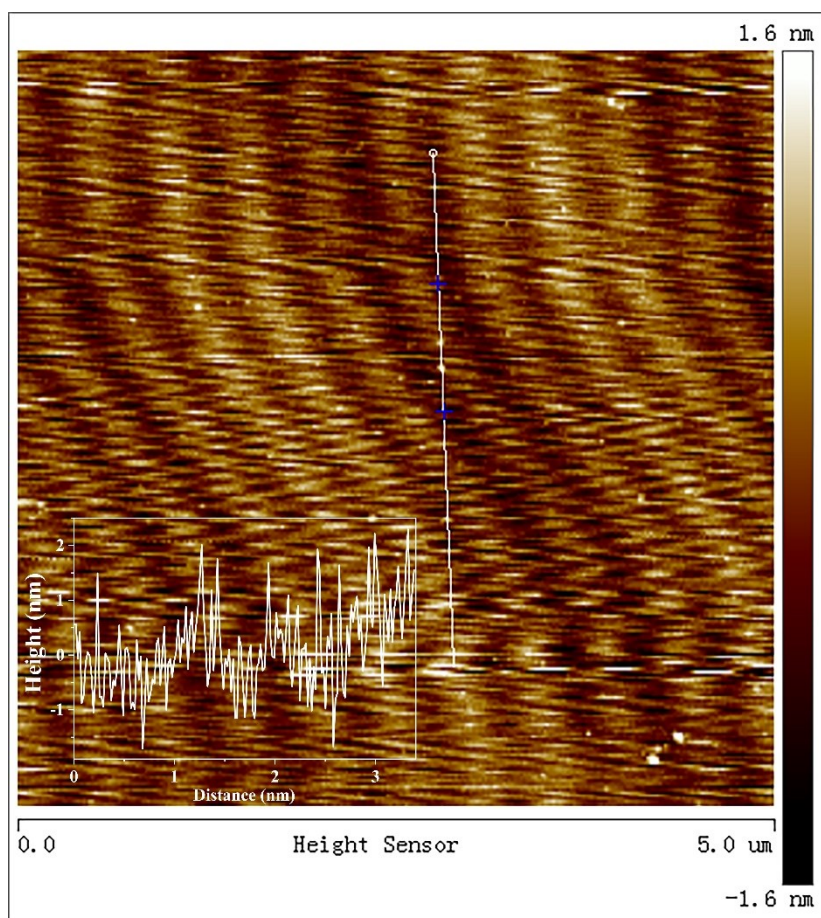

**Fig. S1** AFM image of CDs

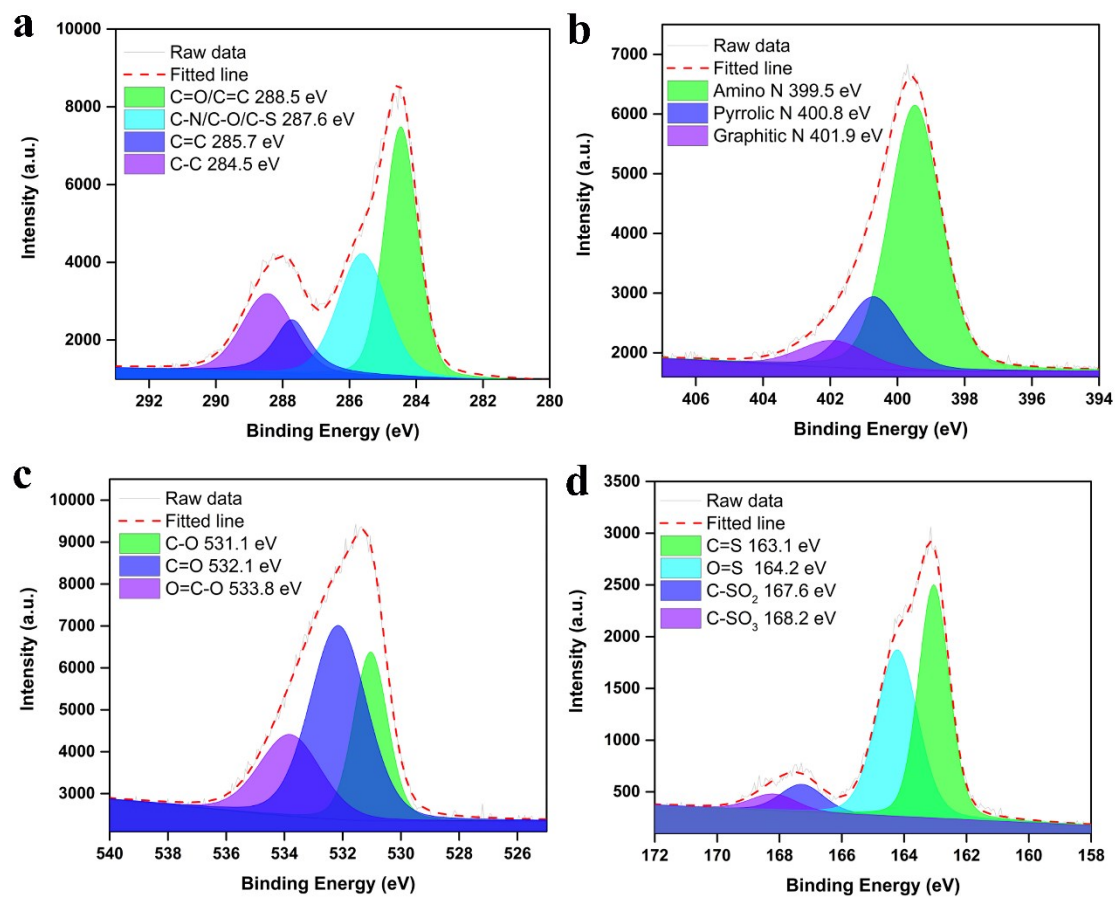

**Fig. S2** a) C1s spectrum b) N1s spectrum c) O1s spectrum d) S2p spectrum of CDs, respectively.

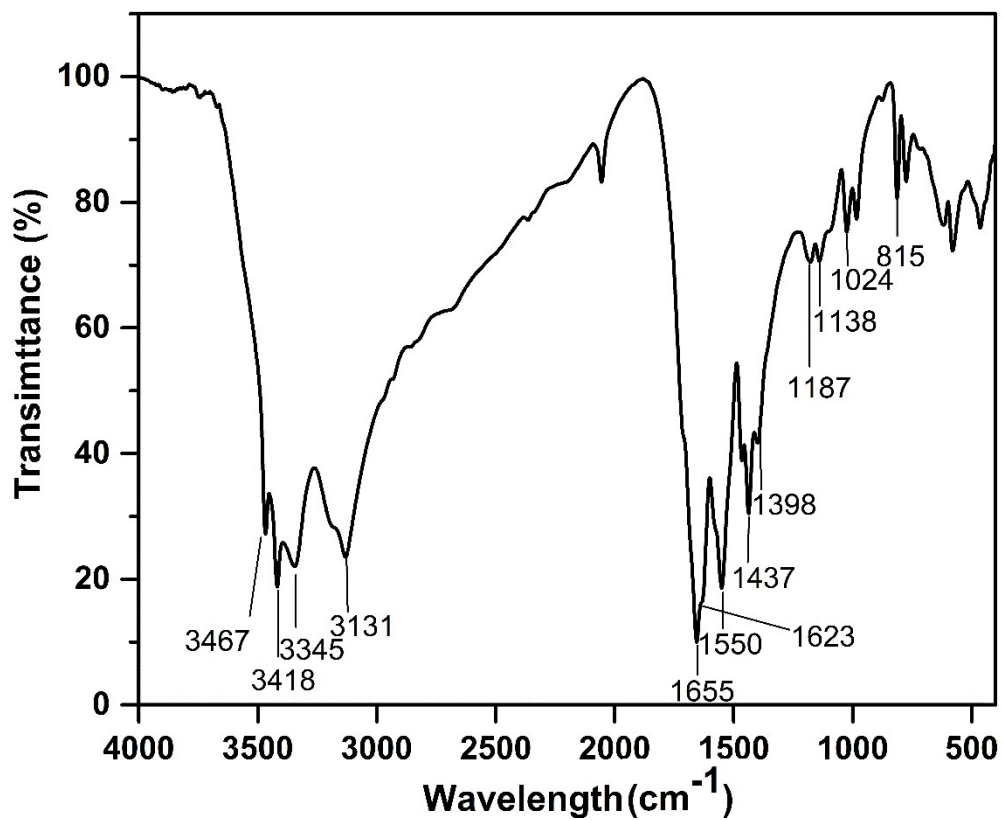

Fig. S3 FT-IR spectrum of CDs.

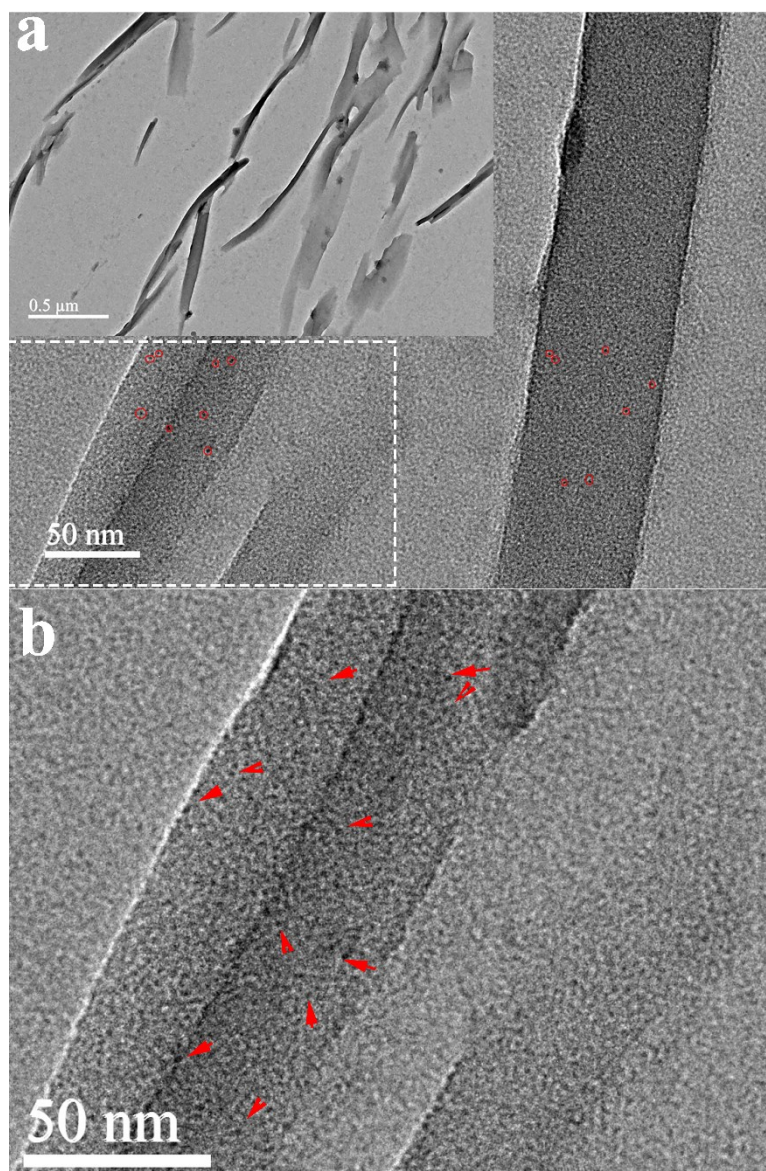

**Fig. S4** TEM images of CDs@IPA under 0.5 μm and 50 nm scale bar. b) The local TEM image of CDs@IPA.

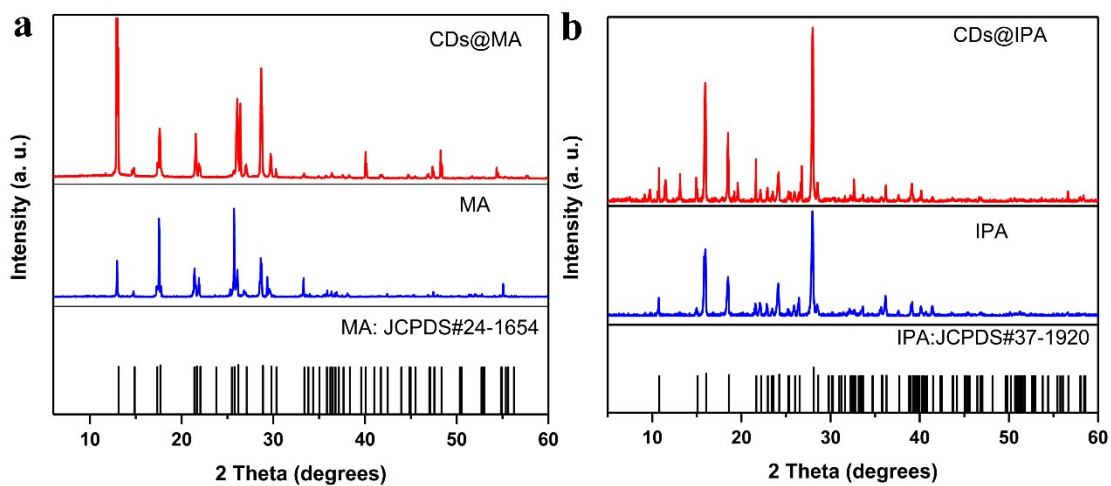

**Fig. S5** a) XRD pattern of the CDs@MA, MA and MA XRD card. b) XRD pattern of the CDs@IPA, IPA and IPA XRD card.

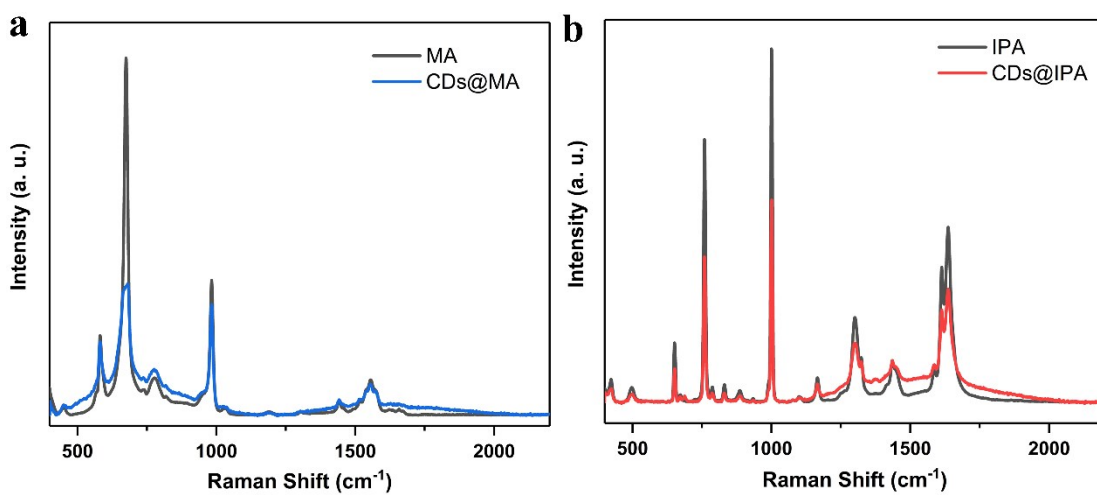

**Fig. S6** a) Raman spectra of CDs@MA and MA. b) Raman spectra of CDs@IPA and IPA.



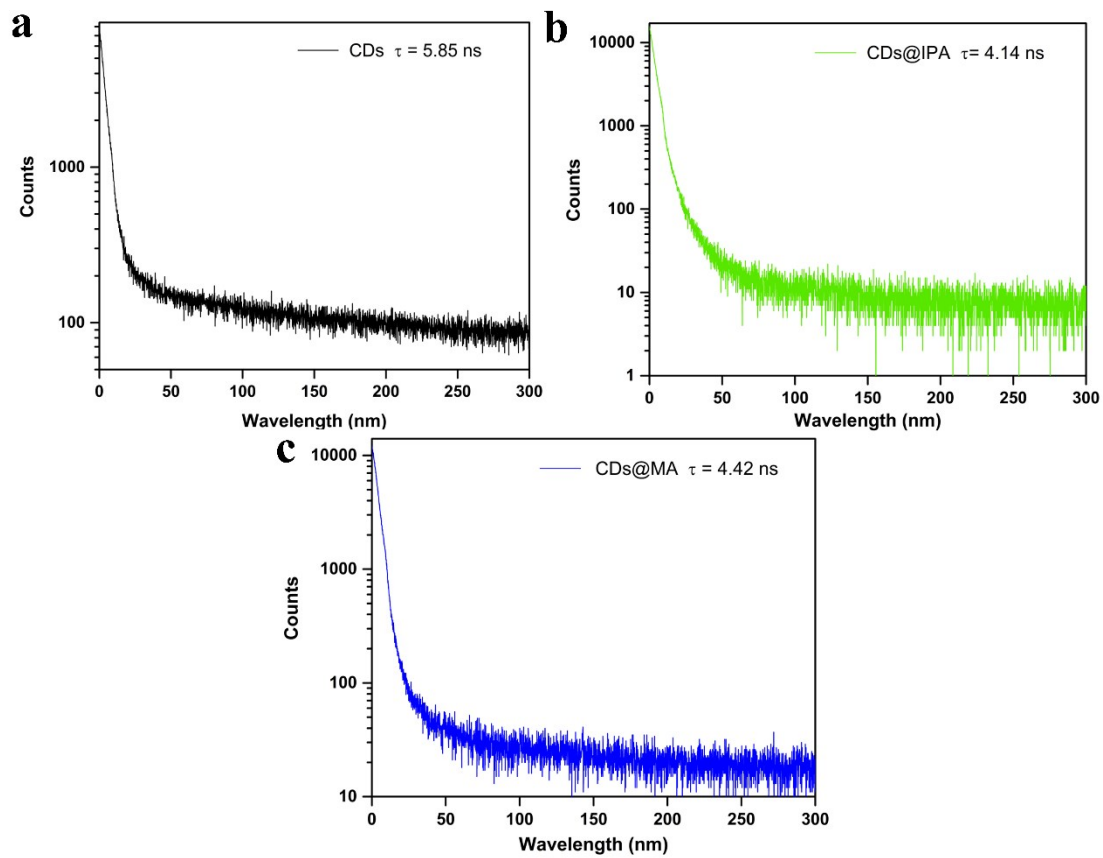

**Fig. S7** FL decay curves of a) CDs, b) CDs@IPA and c) CDs@MA

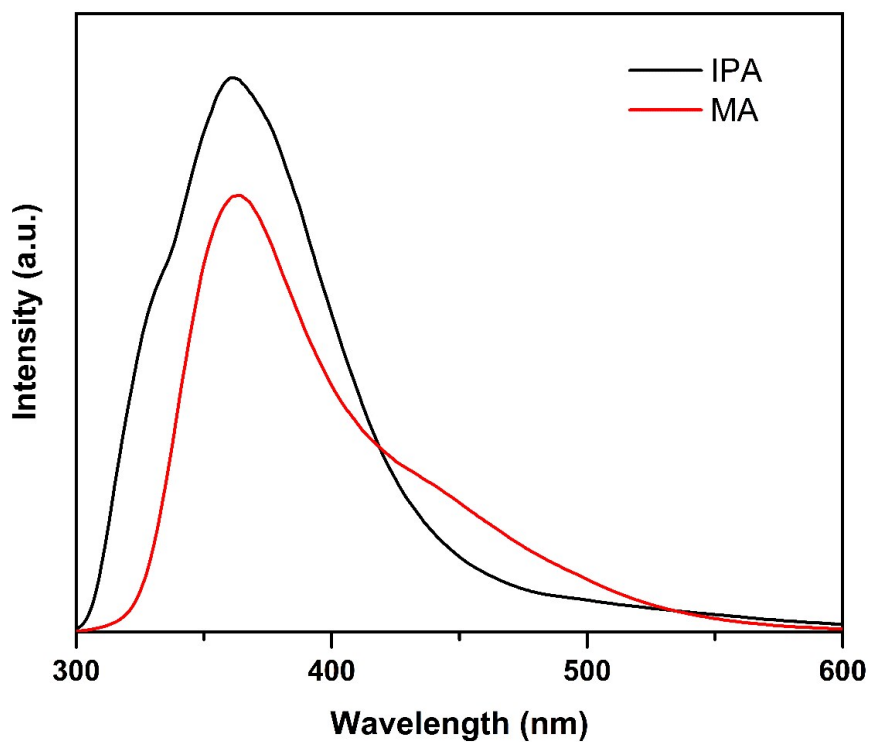

**Fig. S8** The FL emission spectra of IPA and MA ( $\lambda_{\text{ex}}=280$  nm).

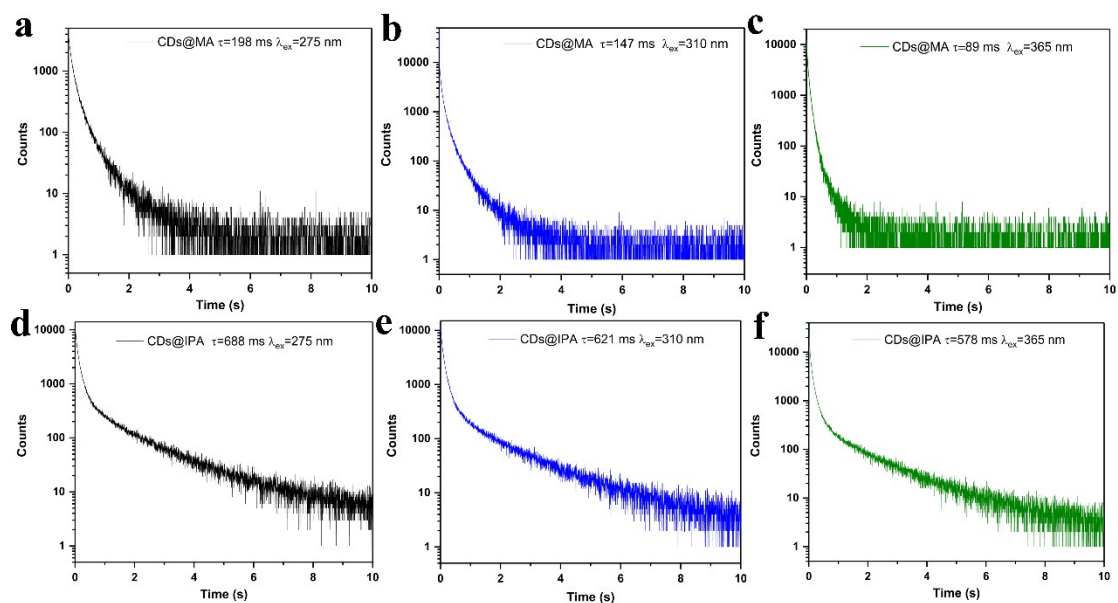

**Fig. S9** RTP decay profiles of CDs@MA under excitation wavelength at a) 275 nm, b) 310 nm and c) 365 nm. RTP decay profiles of CDs@IPA under excitation wavelength at d) 275 nm, e) 310 nm and f) 365 nm.



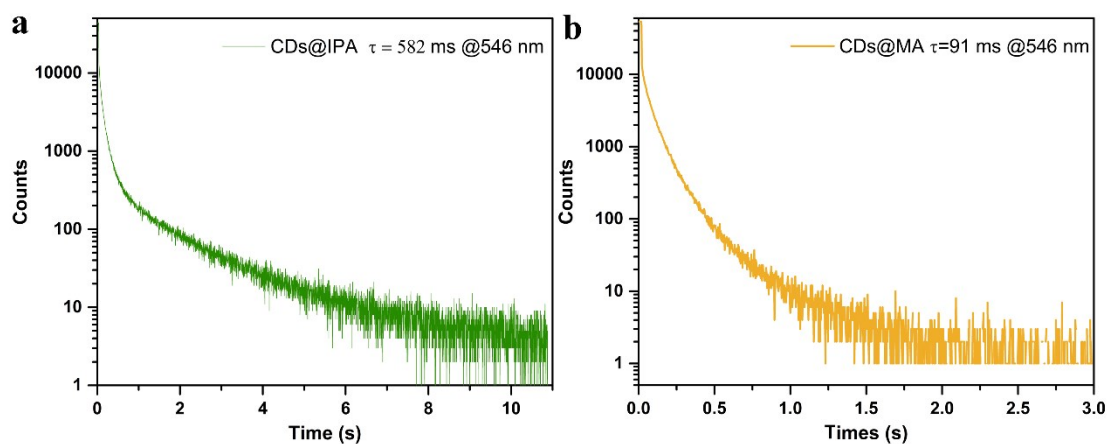

**Fig. S10** RTP decay profiles of a) CD@IPA and b) CD@MA.

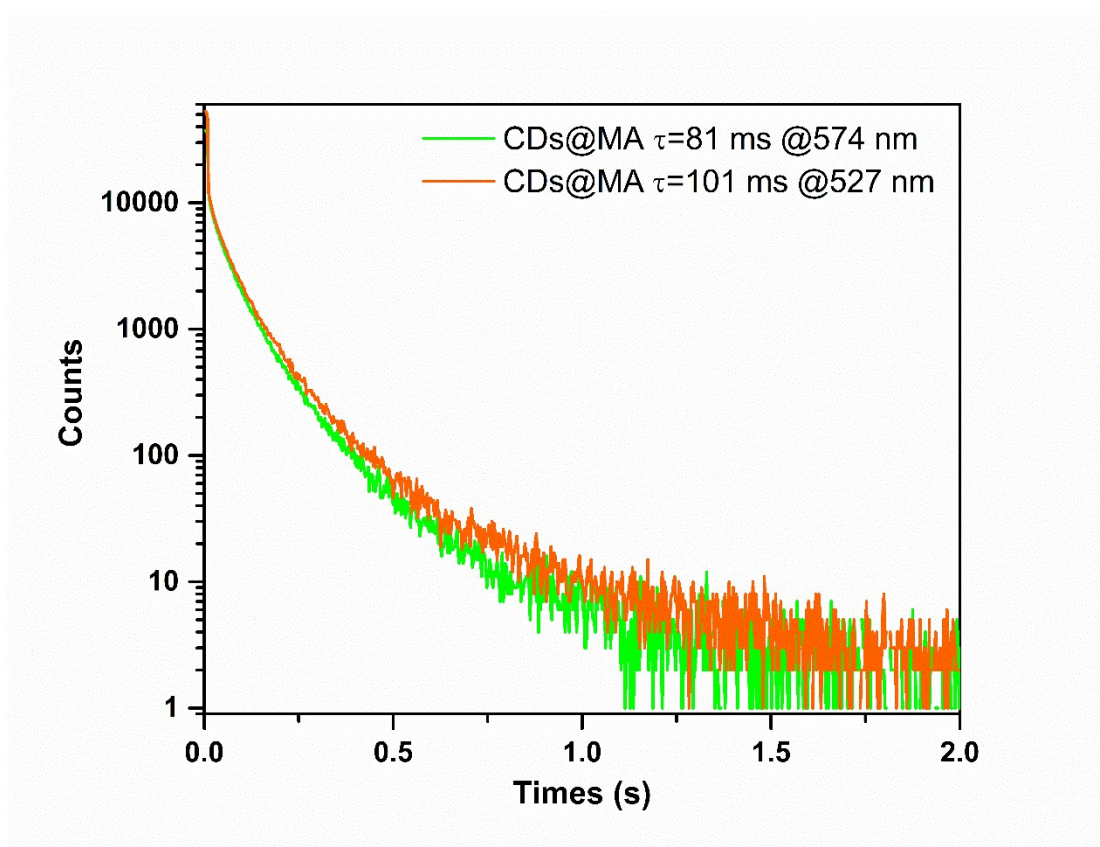

**Fig. S11** Corresponding RTP decay profiles of CD@MA ( $\lambda_{\text{ex}} = 360$  nm).

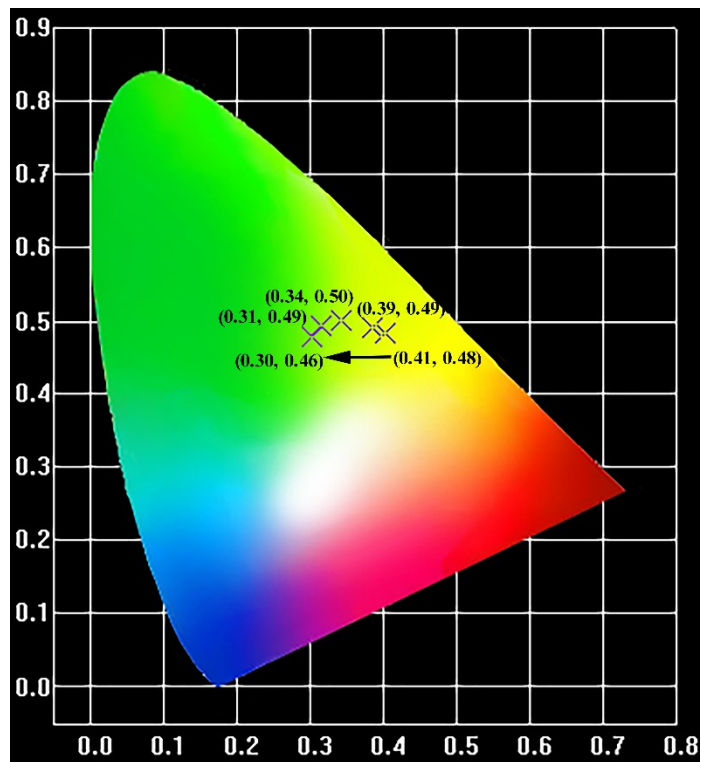

**Fig. S12** CIE coordinates of time-dependent color of CDs@MA.

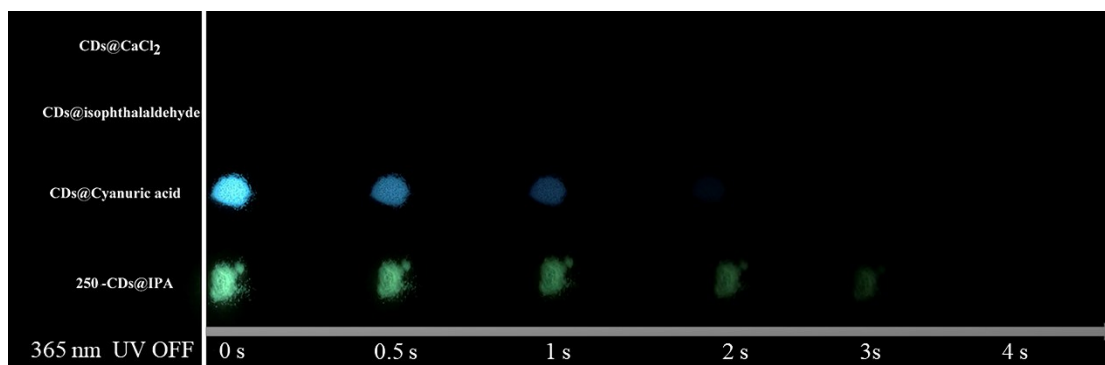

**Fig. S13** Photographs of CDs@CaCl<sub>2</sub>, CDs@isophthalaldehyde, CDs@cyanuric acid and 250°C-CDs@IPA.

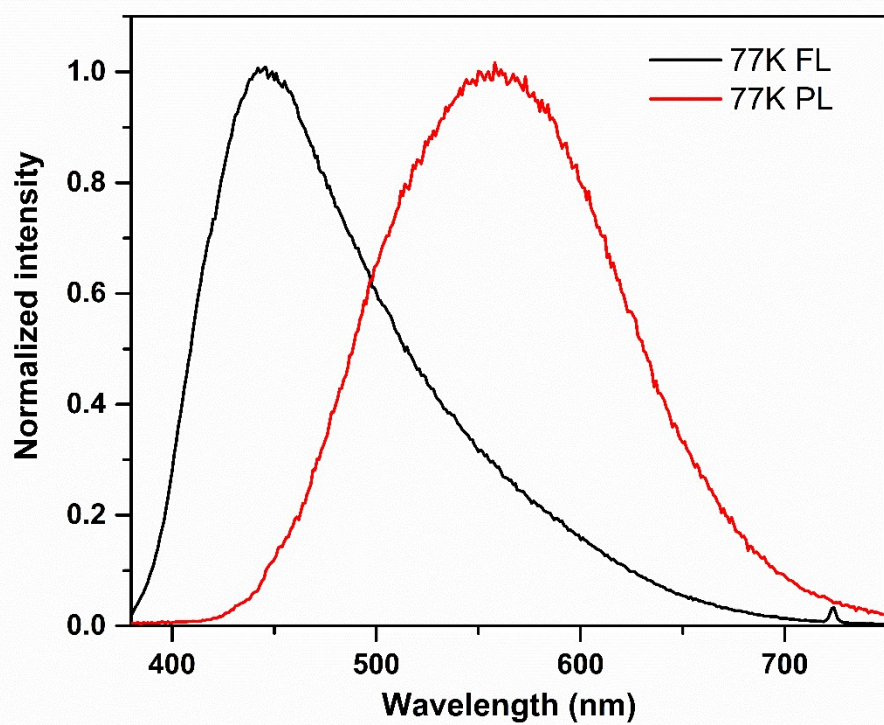

**Fig. S14** Normalized fluorescence and phosphorescence spectra of CDs@IPA at 77 K ( $\lambda_{\text{ex}} = 360 \text{ nm}$ ).

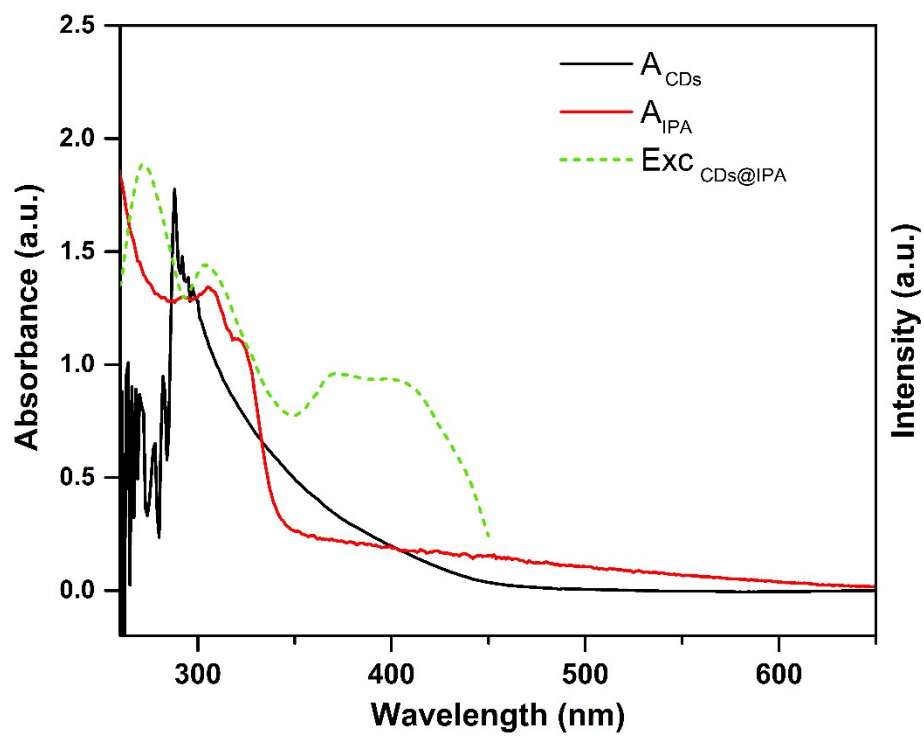

**Fig. S15** UV-vis absorbance spectra of CDs and IPA matrix, and the RTP excitation spectrum of CDs@IPA at 546 nm.

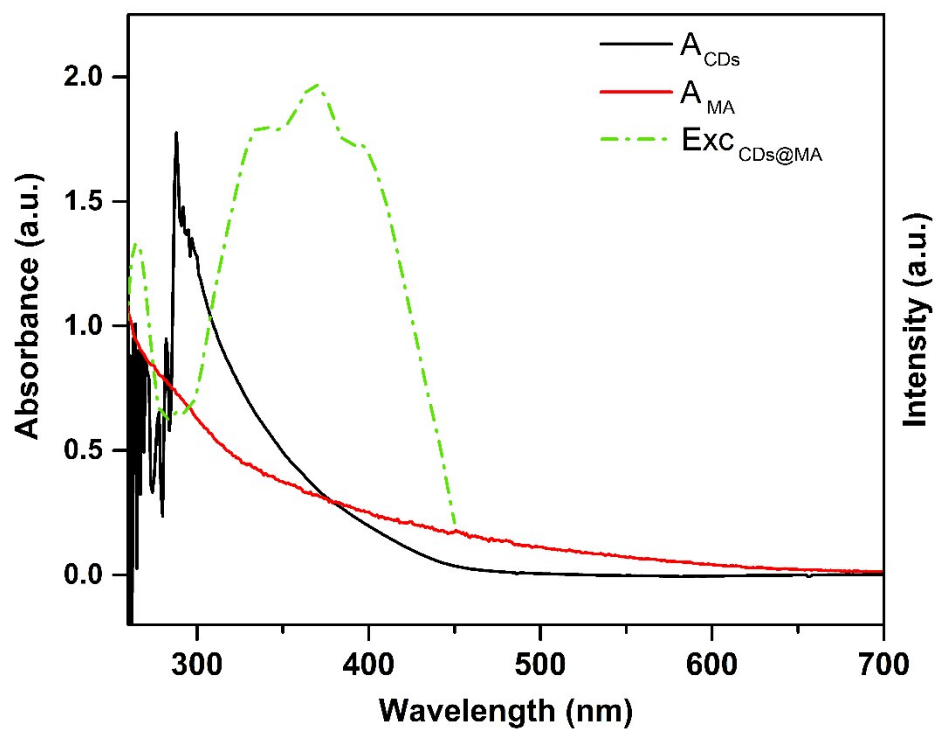

**Fig. S16** UV-vis absorbance spectra of CDs and MA matrix, and the RTP excitation spectrum of CDs@MA at 546 nm.

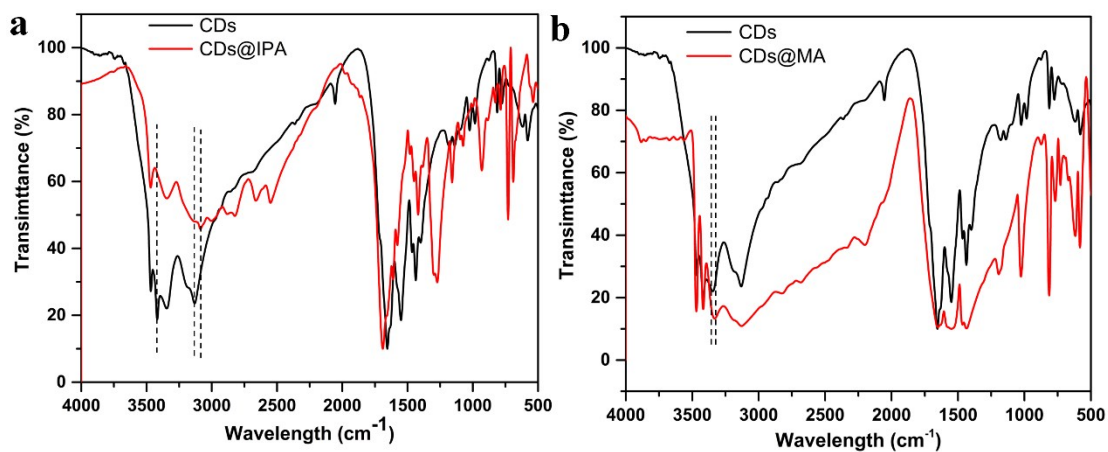

**Fig. S17** FT-IR spectrum of CDs@IPA and CDs@MA.

**Table S1.** The RTP decay profiles of the CDs@IPA and CDs@MA at different emission wavelength.

| Composite | $\lambda_{em}$<br>(nm) | $\tau_1$<br>(ms) | $B_1$<br>(%) | $\tau_2$<br>(ms) | $B_2$<br>(%) | $\tau_3$<br>(ms) | $B_3$<br>(%) | $\tau_{avg}$<br>(ms) |
|-----------|------------------------|------------------|--------------|------------------|--------------|------------------|--------------|----------------------|
| CDs@IPA   | 546                    | 179.85           | 39.00        | 1509.00          | 32.90        | 50.87            | 28.10        | 582                  |
|           | 532                    | 190.75           | 36.26        | 1552.57          | 39.13        | 53.65            | 24.61        | 686                  |
|           | 578                    | 146.34           | 44.51        | 4.12             | 32.19        | 1366.61          | 23.30        | 395                  |
| CDs@MA    | 546                    | 18.47            | 13.97        | 67.39            | 71.73        | 207.55           | 18.64        | 91                   |
|           | 527                    | 20.35            | 14.70        | 76.34            | 66.25        | 244.08           | 19.05        | 101                  |
|           | 574                    | 16.16            | 12.71        | 65.16            | 68.75        | 188.72           | 18.54        | 81                   |
